# Supplementary material
Source: MDPI journal article supplement (https://www.mdpi.com/1999-4907/13/3/462)
Supplement: s1 [file s1]

**Table S1.** Details of experimental areas in subalpine spruce forests.

| Experimental area | Forest type    | Altitude (m) | Aspect <sup>1</sup> | Slope (°) | Stand age | Canopy density | Height (m) | Mean diameter at breast height (cm) | Herb layer coverage | Moss layer coverage | Arbor layer species                       |
|-------------------|----------------|--------------|---------------------|-----------|-----------|----------------|------------|-------------------------------------|---------------------|---------------------|-------------------------------------------|
| Area 1            | Plantation     | 3,305        | N                   | 27.50     | 29        | 0.80           | 8.68       | 10.62                               | 0.10                | 1.00                | <i>Picea</i>                              |
|                   | Natural forest | 3,419        | N                   | 34.00     | 229       | 0.65           | 26.24      | 22.31                               | 0.25                | 0.93                | <i>Picea</i> associated with <i>Abies</i> |
| Area 2            | Plantation     | 3,092        | NE                  | 39.30     | 34        | 0.76           | 10.63      | 12.82                               | 0.10                | -                   | <i>Picea</i>                              |
|                   | Natural forest | 3,329        | NE                  | 28.67     | 260       | 0.60           | 29.11      | 38.91                               | 0.23                | 0.77                | <i>Picea</i> associated with <i>Abies</i> |
| Area 3            | Plantation     | 3,354        | NW                  | 17.30     | 25        | 0.65           | 6.35       | 12.61                               | 0.15                | 0.82                | <i>Picea</i>                              |
|                   | Natural forest | 3,377        | NW                  | 20.50     | 287       | 0.53           | 31.50      | 44.17                               | 0.25                | 0.78                | <i>Picea</i> associated with <i>Abies</i> |
| Area 4            | Plantation     | 3,171        | NW                  | 5.00      | 30        | 0.63           | 8.00       | 11.70                               | 0.20                | 0.96                | <i>Picea</i>                              |
|                   | Natural forest | 3,240        | NW                  | 7.67      | 227       | 0.73           | 26.00      | 19.63                               | 0.25                | 0.96                | <i>Picea</i>                              |
| Area 5            | Plantation     | 3,185        | NE                  | 24.67     | 34        | 0.67           | 13.00      | 14.45                               | 0.30                | 0.93                | <i>Picea</i>                              |
|                   | Natural forest | 3,227        | N                   | 14.30     | 325       | 0.75           | 35.00      | 24.76                               | 0.50                | 0.78                | <i>Picea</i> associated with <i>Abies</i> |

<sup>1</sup> N: north; NE: northeast; NW: northwest.

**Table S2.** Average nematode individual density (ind./100 g dry matter) in different layers in subalpine spruce plantation and natural forests.

| Family                | Genus                       | Functional guild | Individual biomass carbon ( $\mu\text{g}$ ) | Plantation individual density |               |             | Natural forest individual density |             |             |
|-----------------------|-----------------------------|------------------|---------------------------------------------|-------------------------------|---------------|-------------|-----------------------------------|-------------|-------------|
|                       |                             |                  |                                             | Moss                          | Litter        | Soil        | Moss                              | Litter      | Soil        |
| 1. Alloionematidae    | 1. <i>Rhabditophanes</i>    | Ba1              | 0.008                                       | 0                             | 0             | 0           | 0                                 | 29 $\pm$ 29 | 3 $\pm$ 3   |
| 2. Bunonematidae      | 2. <i>Bunonema</i>          | Ba1              | 0.004                                       | 13 $\pm$ 13                   | 25 $\pm$ 14   | 0           | 22 $\pm$ 16                       | 0           | 1 $\pm$ 1   |
| 3. Diplogasteridae    | 3. <i>Butlerius</i>         | Ba1              | 0.004                                       | 38 $\pm$ 38                   | 0             | 0           | 0                                 | 0           | 0           |
|                       | 4. <i>Demaniella</i>        | Ba1              | 0.012                                       | 0                             | 0             | 0           | 0                                 | 5 $\pm$ 5   | 0           |
|                       | 5. <i>Diplogasteritus</i>   | Ba1              | 0.002                                       | 951 $\pm$ 909                 | 0             | 0           | 63 $\pm$ 26                       | 13 $\pm$ 10 | 0           |
| 4. Neodiplogasteridae | 6. <i>Diplenteron</i>       | Ba1              | 0.460                                       | 0                             | 0             | 1 $\pm$ 1   | 0                                 | 0           | 0           |
|                       | 7. <i>Fictor</i>            | Ba1              | 0.024                                       | 0                             | 7 $\pm$ 7     | 0           | 0                                 | 16 $\pm$ 16 | 0           |
|                       | 8. <i>Mononchoides</i>      | Ba1              | 0.004                                       | 13 $\pm$ 13                   | 0             | 0           | 0                                 | 0           | 0           |
|                       | 9. <i>Pareudiplogaster</i>  | Ba1              | 0.009                                       | 0                             | 12 $\pm$ 12   | 0           | 15 $\pm$ 15                       | 13 $\pm$ 9  | 0           |
| 5. Panagrolaimidae    | 10. <i>Panagrellus</i>      | Ba1              | 0.428                                       | 0                             | 0             | 4 $\pm$ 4   | 0                                 | 0           | 1 $\pm$ 1   |
|                       | 11. <i>Panagrobelus</i>     | Ba1              | 0.001                                       | 0                             | 0             | 0           | 0                                 | 0           | 1 $\pm$ 1   |
|                       | 12. <i>Panagrolaimus</i>    | Ba1              | 0.005                                       | 161 $\pm$ 111                 | 27 $\pm$ 17   | 17 $\pm$ 13 | 80 $\pm$ 58                       | 18 $\pm$ 12 | 2 $\pm$ 1   |
| 6. Rhabditidae        | 13. <i>Rhabditidae</i>      | Ba1              | 0.016                                       | 292 $\pm$ 265                 | 30 $\pm$ 22   | 13 $\pm$ 5  | 36 $\pm$ 25                       | 17 $\pm$ 11 | 5 $\pm$ 2   |
| 7. Cephalobidae       | 14. <i>Acrobeles</i>        | Ba2              | 0.008                                       | 0                             | 0             | 16 $\pm$ 12 | 22 $\pm$ 15                       | 0           | 8 $\pm$ 5   |
|                       | 15. <i>Acrobeloides</i>     | Ba2              | 0.006                                       | 10 $\pm$ 10                   | 196 $\pm$ 170 | 35 $\pm$ 15 | 8 $\pm$ 6                         | 62 $\pm$ 33 | 10 $\pm$ 7  |
|                       | 16. <i>Acrolobus</i>        | Ba2              | 0.001                                       | 5 $\pm$ 5                     | 0             | 7 $\pm$ 4   | 0                                 | 0           | 0           |
|                       | 17. <i>Cephalobus</i>       | Ba2              | 0.019                                       | 0                             | 0             | 0           | 0                                 | 0           | 1 $\pm$ 1   |
|                       | 18. <i>Cervidellus</i>      | Ba2              | 0.005                                       | 8 $\pm$ 8                     | 105 $\pm$ 28  | 0           | 30 $\pm$ 15                       | 53 $\pm$ 20 | 15 $\pm$ 10 |
|                       | 19. <i>Chiloplacus</i>      | Ba2              | 0.001                                       | 0                             | 0             | 0           | 0                                 | 10 $\pm$ 10 | 0           |
|                       | 20. <i>Eucephalobus</i>     | Ba2              | 0.006                                       | 5 $\pm$ 5                     | 213 $\pm$ 108 | 14 $\pm$ 5  | 47 $\pm$ 30                       | 39 $\pm$ 23 | 5 $\pm$ 2   |
|                       | 21. <i>Heterocephalobus</i> | Ba2              | 0.006                                       | 0                             | 19 $\pm$ 14   | 8 $\pm$ 4   | 6 $\pm$ 6                         | 38 $\pm$ 21 | 5 $\pm$ 4   |
|                       | 22. <i>Chronogaster</i>     | Ba2              | 0.001                                       | 0                             | 0             | 14 $\pm$ 6  | 0                                 | 0           | 5 $\pm$ 4   |

| Family                | Genus                         | Functional guild | Individual biomass carbon (µg) | Plantation individual density |            |          | Natural forest individual density |            |          |
|-----------------------|-------------------------------|------------------|--------------------------------|-------------------------------|------------|----------|-----------------------------------|------------|----------|
|                       |                               |                  |                                | Moss                          | Litter     | Soil     | Moss                              | Litter     | Soil     |
|                       | 23. <i>Leptolaimus</i>        | Ba2              | 0.007                          | 0                             | 0          | 10 ± 6   | 0                                 | 0          | 0        |
| 9. Microlaimidae      | 24. <i>Microlaimus</i>        | Ba2              | 0.004                          | 0                             | 0          | 3 ± 2    | 25 ± 25                           | 0          | 1 ± 1    |
| 10. Monhysteridae     | 25. <i>Eumonhystera</i>       | Ba2              | 0.004                          | 495 ± 222                     | 361 ± 91   | 13 ± 6   | 721 ± 124                         | 609 ± 143  | 15 ± 6   |
|                       | 26. <i>Monhystera</i>         | Ba2              | 0.001                          | 19 ± 19                       | 0          | 0        | 0                                 | 0          | 0        |
|                       | 27. <i>Monhystrella</i>       | Ba2              | 0.005                          | 0                             | 8 ± 6      | 0        | 0                                 | 14 ± 9     | 0        |
| 11. Osstellidae       | 28. <i>Deficephalobus</i>     | Ba2              | 0.007                          | 0                             | 0          | 0        | 29 ± 29                           | 0          | 0        |
| 12. Plectidae         | 29. <i>Anaplectus</i>         | Ba2              | 0.041                          | 58 ± 18                       | 93 ± 28    | 22 ± 11  | 108 ± 85                          | 110 ± 57   | 9 ± 5    |
|                       | 30. <i>Plectus</i>            | Ba2              | 0.028                          | 2023 ± 478                    | 1666 ± 244 | 269 ± 55 | 2863 ± 291                        | 2537 ± 359 | 178 ± 22 |
|                       | 31. <i>Tylocephalus</i>       | Ba2              | 0.005                          | 0                             | 29 ± 19    | 4 ± 3    | 0                                 | 53 ± 35    | 1 ± 1    |
|                       | 32. <i>Wilsonema</i>          | Ba2              | 0.003                          | 0                             | 93 ± 38    | 114 ± 27 | 31 ± 31                           | 88 ± 37    | 44 ± 9   |
| 13. Achromadoridae    | 33. <i>Achromadora</i>        | Ba3              | 0.007                          | 133 ± 92                      | 237 ± 70   | 13 ± 7   | 201 ± 55                          | 237 ± 79   | 5 ± 4    |
| 14. Aulolaimidae      | 34. <i>Aulolaimus</i>         | Ba3              | 0.027                          | 0                             | 0          | 0        | 0                                 | 0          | 2 ± 1    |
| 15. Bastianiidae      | 35. <i>Bastiania</i>          | Ba3              | 0.010                          | 59 ± 23                       | 401 ± 166  | 70 ± 14  | 197 ± 84                          | 232 ± 70   | 23 ± 6   |
| 16. Chromadoridae     | 36. <i>Chromadorina</i>       | Ba3              | 0.001                          | 0                             | 0          | 1 ± 1    | 0                                 | 0          | 0        |
|                       | 37. <i>Prochromadora</i>      | Ba3              | 0.003                          | 138 ± 69                      | 192 ± 60   | 10 ± 5   | 274 ± 90                          | 154 ± 52   | 8 ± 6    |
| 17. Diplopeltidae     | 38. <i>Cylindrolaimus</i>     | Ba3              | 0.011                          | 4 ± 4                         | 4 ± 4      | 2 ± 1    | 0                                 | 8 ± 8      | 0        |
| 18. Halaphanolaimidae | 39. <i>Aphanolaimus</i>       | Ba3              | 0.003                          | 0                             | 7 ± 7      | 2 ± 2    | 63 ± 36                           | 0          | 0        |
| 19. Hypodontolaimidae | 40. <i>Dichromadora</i>       | Ba3              | 0.195                          | 0                             | 0          | 0        | 0                                 | 23 ± 23    | 0        |
| 20. Odontolaimidae    | 41. <i>Odontolaimus</i>       | Ba3              | 0.005                          | 11 ± 11                       | 126 ± 73   | 12 ± 6   | 42 ± 27                           | 66 ± 33    | 4 ± 3    |
| 21. Onchulidae        | 42. <i>Stenonchulus</i>       | Ba3              | 0.002                          | 0                             | 0          | 4 ± 2    | 0                                 | 0          | 4 ± 4    |
| 22. Prismatolaimidae  | 43. <i>Prismatolaimus</i>     | Ba3              | 0.003                          | 15 ± 11                       | 126 ± 57   | 106 ± 31 | 99 ± 41                           | 186 ± 58   | 89 ± 33  |
| 23. Rhabdolaimidae    | 44. <i>Rhabdolaimus</i>       | Ba3              | 0.002                          | 0                             | 18 ± 14    | 28 ± 7   | 8 ± 8                             | 32 ± 15    | 8 ± 3    |
| 24. Teratocephalidae  | 45. <i>Euteratocephalus</i>   | Ba3              | 0.001                          | 0                             | 0          | 0        | 0                                 | 0          | 1 ± 1    |
|                       | 46. <i>Metateratocephalus</i> | Ba3              | 0.003                          | 101 ± 61                      | 73 ± 23    | 45 ± 34  | 146 ± 44                          | 209 ± 60   | 30 ± 7   |

| Family                | Genus                        | Functional guild | Individual biomass carbon (µg) | Plantation individual density |           |          | Natural forest individual density |           |          |
|-----------------------|------------------------------|------------------|--------------------------------|-------------------------------|-----------|----------|-----------------------------------|-----------|----------|
|                       |                              |                  |                                | Moss                          | Litter    | Soil     | Moss                              | Litter    | Soil     |
| 25. Alaimidae         | 47. <i>Teratocephalus</i>    | Ba3              | 0.004                          | 339 ± 84                      | 561 ± 162 | 161 ± 61 | 811 ± 110                         | 548 ± 100 | 108 ± 15 |
|                       | 48. <i>Alaimus</i>           | Ba4              | 0.006                          | 228 ± 122                     | 187 ± 60  | 13 ± 5   | 445 ± 113                         | 245 ± 63  | 15 ± 4   |
|                       | 49. <i>Amphidelus</i>        | Ba4              | 0.004                          | 0                             | 0         | 17 ± 8   | 23 ± 16                           | 4 ± 4     | 3 ± 3    |
|                       | 50. <i>Paramphidelus</i>     | Ba4              | 0.006                          | 26 ± 26                       | 28 ± 22   | 37 ± 13  | 13 ± 13                           | 9 ± 9     | 12 ± 5   |
| 26. Anguinidae        | 51. <i>Ditylenchus</i>       | Fu2              | 0.009                          | 19 ± 11                       | 15 ± 10   | 0        | 42 ± 18                           | 0         | 0        |
| 27. Aphelenchidae     | 52. <i>Paraphelenchus</i>    | Fu2              | 0.002                          | 190 ± 60                      | 248 ± 62  | 4 ± 3    | 329 ± 80                          | 246 ± 84  | 12 ± 4   |
| 28. Aphelenchoididae  | 53. <i>Aphelenchoides</i>    | Fu2              | 0.002                          | 480 ± 134                     | 440 ± 68  | 17 ± 5   | 360 ± 85                          | 314 ± 72  | 7 ± 4    |
|                       | 54. <i>Bursaphelenchus</i>   | Fu2              | 0.001                          | 0                             | 0         | 0        | 51 ± 39                           | 0         | 0        |
| 29. Neotylenchidae    | 55. <i>Deladenus</i>         | Fu2              | 0.005                          | 0                             | 0         | 2 ± 2    | 0                                 | 0         | 0        |
| 30. Diphtherophoridae | 56. <i>Diphtherophora</i>    | Fu3              | 0.030                          | 0                             | 0         | 4 ± 3    | 0                                 | 0         | 1 ± 1    |
|                       | 57. <i>Doryllium</i>         | Fu4              | 0.088                          | 0                             | 0         | 0        | 0                                 | 0         | 2 ± 2    |
|                       | 58. <i>Leptonchus</i>        | Fu4              | 0.031                          | 3 ± 3                         | 0         | 0        | 0                                 | 9 ± 9     | 3 ± 3    |
|                       | 59. <i>Tylencholaimellus</i> | Fu4              | 0.060                          | 13 ± 13                       | 0         | 8 ± 5    | 0                                 | 0         | 30 ± 18  |
| 31. Paratylenchidae   | 60. <i>Tylencholaimus</i>    | Fu4              | 0.017                          | 329 ± 182                     | 474 ± 128 | 147 ± 54 | 206 ± 70                          | 513 ± 121 | 81 ± 24  |
|                       | 61. <i>Paratylenchus</i>     | He2              | 0.004                          | 0                             | 0         | 2 ± 2    | 0                                 | 0         | 0        |
| 32. Tylenchidae       | 62. <i>Basiria</i>           | He2              | 0.002                          | 436 ± 129                     | 783 ± 288 | 194 ± 33 | 583 ± 102                         | 674 ± 192 | 97 ± 18  |
|                       | 63. <i>Boleodorus</i>        | He2              | 0.002                          | 56 ± 23                       | 53 ± 26   | 150 ± 34 | 229 ± 61                          | 135 ± 33  | 93 ± 18  |
|                       | 64. <i>Ecphyadophora</i>     | He2              | 0.001                          | 0                             | 0         | 11 ± 6   | 0                                 | 13 ± 9    | 0        |
|                       | 65. <i>Filenchus</i>         | He2              | 0.004                          | 291 ± 87                      | 311 ± 79  | 206 ± 28 | 357 ± 124                         | 636 ± 168 | 177 ± 32 |
|                       | 66. <i>Lelenchus</i>         | He2              | 0.003                          | 0                             | 7 ± 7     | 141 ± 40 | 51 ± 43                           | 0         | 127 ± 41 |
|                       | 67. <i>Malenchus</i>         | He2              | 0.004                          | 208 ± 94                      | 457 ± 123 | 268 ± 83 | 835 ± 274                         | 308 ± 69  | 152 ± 43 |
|                       | 68. <i>Miculenchus</i>       | He2              | 0.009                          | 13 ± 13                       | 0         | 4 ± 3    | 0                                 | 12 ± 12   | 5 ± 4    |
|                       | 69. <i>Neopsilenchus</i>     | He2              | 0.020                          | 0                             | 0         | 0        | 0                                 | 0         | 2 ± 2    |
|                       | 70. <i>Cephalenchus</i>      | He2              | 0.012                          | 0                             | 0         | 9 ± 9    | 0                                 | 0         | 1 ± 1    |

| Family              | Genus                      | Functional guild | Individual biomass carbon (µg) | Plantation individual density |          |         | Natural forest individual density |          |         |
|---------------------|----------------------------|------------------|--------------------------------|-------------------------------|----------|---------|-----------------------------------|----------|---------|
|                     |                            |                  |                                | Moss                          | Litter   | Soil    | Moss                              | Litter   | Soil    |
| 34. Belonolaimidae  | 71. <i>Pleurotylenchus</i> | He2              | 0.017                          | 0                             | 0        | 1 ± 1   | 0                                 | 0        | 0       |
|                     | 72. <i>Amplimerlinius</i>  | He3              | 0.020                          | 0                             | 26 ± 18  | 44 ± 21 | 0                                 | 14 ± 10  | 0       |
|                     | 73. <i>Merlinius</i>       | He3              | 0.035                          | 0                             | 0        | 7 ± 4   | 0                                 | 0        | 0       |
| 35. Criconematidae  | 74. <i>Criconema</i>       | He3              | 0.011                          | 0                             | 0        | 0       | 0                                 | 0        | 4 ± 4   |
|                     | 75. <i>Criconemella</i>    | He3              | 0.027                          | 0                             | 0        | 74 ± 21 | 0                                 | 0        | 69 ± 16 |
|                     | 76. <i>Macroposthonia</i>  | He3              | 0.004                          | 0                             | 0        | 0       | 0                                 | 0        | 4 ± 2   |
| 36. Hoplolaimidae   | 77. <i>Helicotylenchus</i> | He3              | 0.010                          | 6 ± 6                         | 14 ± 14  | 45 ± 19 | 0                                 | 0        | 17 ± 7  |
|                     | 78. <i>Pararotylenchus</i> | He3              | 0.011                          | 5 ± 5                         | 7 ± 7    | 23 ± 10 | 14 ± 14                           | 0        | 17 ± 13 |
|                     | 79. <i>Rotylenchus</i>     | He3              | 0.017                          | 0                             | 0        | 39 ± 13 | 0                                 | 0        | 16 ± 9  |
| 37. Nordiidae       | 80. <i>Longidorella</i>    | He4              | 0.004                          | 0                             | 0        | 0       | 9 ± 9                             | 0        | 1 ± 1   |
|                     | 81. <i>Pungentus</i>       | He4              | 0.048                          | 0                             | 0        | 1 ± 1   | 7 ± 7                             | 0        | 0       |
| 38. Belondiridae    | 82. <i>Axonchium</i>       | He5              | 0.339                          | 0                             | 0        | 0       | 0                                 | 0        | 1 ± 1   |
|                     | 83. <i>Dorylaimellus</i>   | He5              | 0.042                          | 4 ± 4                         | 53 ± 24  | 4 ± 3   | 24 ± 17                           | 51 ± 33  | 1 ± 1   |
|                     | 84. <i>Oxydirus</i>        | He5              | 0.195                          | 0                             | 0        | 1 ± 1   | 0                                 | 0        | 0       |
| 39. Longidoridae    | 85. <i>Longidorus</i>      | He5              | 1.458                          | 0                             | 0        | 0       | 0                                 | 6 ± 6    | 0       |
|                     | 86. <i>Xiphinema</i>       | He5              | 0.154                          | 0                             | 0        | 0       | 13 ± 13                           | 0        | 0       |
| 40. Leptonchidae    | 87. <i>Dorylaimoides</i>   | Om4              | 0.038                          | 10 ± 10                       | 21 ± 15  | 7 ± 3   | 0                                 | 53 ± 24  | 3 ± 2   |
|                     | 88. <i>Thornia</i>         | Om4              | 0.127                          | 0                             | 12 ± 12  | 9 ± 9   | 0                                 | 0        | 0       |
| 41. Qudsianematidae | 89. <i>Dorydorella</i>     | Om4              | 0.066                          | 6 ± 6                         | 7 ± 7    | 3 ± 2   | 0                                 | 10 ± 10  | 3 ± 3   |
|                     | 90. <i>Epidorylaimus</i>   | Om4              | 0.043                          | 28 ± 13                       | 99 ± 28  | 36 ± 11 | 45 ± 24                           | 132 ± 39 | 33 ± 11 |
|                     | 91. <i>Microdorylaimus</i> | Om4              | 0.012                          | 376 ± 120                     | 260 ± 74 | 30 ± 9  | 420 ± 82                          | 374 ± 89 | 26 ± 10 |
| 42. Chrysonematidae | 92. <i>Chrysonnemoides</i> | Om5              | 0.013                          | 0                             | 0        | 0       | 0                                 | 0        | 2 ± 1   |
| 43. Thornenematidae | 93. <i>Laimydorus</i>      | Om5              | 0.411                          | 0                             | 0        | 0       | 0                                 | 0        | 3 ± 3   |
|                     | 94. <i>Mesodorylaimus</i>  | Om5              | 0.073                          | 44 ± 38                       | 34 ± 19  | 10 ± 9  | 0                                 | 0        | 0       |

| Family             | Genus                       | Functional guild | Individual biomass carbon (µg) | Plantation individual density |           |        | Natural forest individual density |           |        |
|--------------------|-----------------------------|------------------|--------------------------------|-------------------------------|-----------|--------|-----------------------------------|-----------|--------|
|                    |                             |                  |                                | Moss                          | Litter    | Soil   | Moss                              | Litter    | Soil   |
|                    | 95. <i>Prodorylaimus</i>    | Om5              | 0.100                          | 0                             | 12 ± 9    | 0      | 21 ± 15                           | 15 ± 12   | 0      |
| 44. Tobrilidae     | 96. <i>Tobrilus</i>         | Pr3              | 0.779                          | 0                             | 0         | 1 ± 1  | 0                                 | 0         | 0      |
| 45. Tripylidae     | 97. <i>Paratripyla</i>      | Pr3              | 0.082                          | 0                             | 0         | 1 ± 1  | 0                                 | 0         | 3 ± 2  |
|                    | 98. <i>Tripyla</i>          | Pr3              | 0.183                          | 0                             | 0         | 5 ± 3  | 0                                 | 0         | 1 ± 1  |
|                    | 99. <i>Trischistoma</i>     | Pr3              | 0.010                          | 9 ± 6                         | 0         | 10 ± 6 | 9 ± 9                             | 0         | 8 ± 4  |
| 46. Anatonchidae   | 100. <i>Miconchus</i>       | Pr4              | 0.329                          | 32 ± 26                       | 292 ± 126 | 1 ± 1  | 42 ± 35                           | 204 ± 89  | 0      |
| 47. Ironidae       | 101. <i>Ironus</i>          | Pr4              | 0.002                          | 0                             | 0         | 10 ± 5 | 0                                 | 0         | 0      |
| 48. Mononchidae    | 102. <i>Clarkus</i>         | Pr4              | 0.054                          | 101 ± 75                      | 4 ± 4     | 5 ± 3  | 68 ± 32                           | 4 ± 4     | 14 ± 5 |
|                    | 103. <i>Coomansus</i>       | Pr4              | 0.039                          | 155 ± 67                      | 611 ± 161 | 5 ± 4  | 190 ± 86                          | 434 ± 241 | 5 ± 2  |
|                    | 104. <i>Iotonchus</i>       | Pr4              | 0.340                          | 0                             | 0         | 1 ± 1  | 26 ± 26                           | 0         | 1 ± 1  |
|                    | 105. <i>Mononchus</i>       | Pr4              | 0.053                          | 120 ± 34                      | 283 ± 72  | 15 ± 6 | 441 ± 81                          | 304 ± 88  | 13 ± 4 |
|                    | 106. <i>Mylonchulus</i>     | Pr4              | 0.037                          | 57 ± 31                       | 99 ± 26   | 2 ± 2  | 26 ± 26                           | 229 ± 80  | 3 ± 2  |
|                    | 107. <i>Parkellus</i>       | Pr4              | 0.091                          | 72 ± 50                       | 0         | 7 ± 3  | 80 ± 60                           | 0         | 0      |
|                    | 108. <i>Prionchulus</i>     | Pr4              | 0.244                          | 475 ± 142                     | 260 ± 67  | 1 ± 1  | 507 ± 114                         | 204 ± 59  | 0      |
|                    | 109. <i>Eudorylaimus</i>    | Pr4              | 0.161                          | 2129 ± 809                    | 545 ± 124 | 28 ± 8 | 1275 ± 330                        | 630 ± 166 | 19 ± 9 |
|                    | 110. <i>Thonus</i>          | Pr4              | 0.042                          | 158 ± 75                      | 145 ± 35  | 11 ± 5 | 135 ± 38                          | 144 ± 31  | 16 ± 5 |
| 49. Actinolaimidae | 111. <i>Paractinolaimus</i> | Pr5              | 0.102                          | 62 ± 26                       | 13 ± 13   | 0      | 88 ± 42                           | 31 ± 15   | 0      |
| 50. Aporcelaimidae | 112. <i>Aporcelaimellus</i> | Pr5              | 0.378                          | 121 ± 41                      | 387 ± 141 | 5 ± 4  | 82 ± 35                           | 205 ± 96  | 1 ± 1  |
|                    | 113. <i>Paraxonchium</i>    | Pr5              | 2.448                          | 0                             | 0         | 0      | 0                                 | 0         | 1 ± 1  |
| 51. Nygolaimidae   | 114. <i>Aetholaimus</i>     | Pr5              | 0.028                          | 6 ± 6                         | 0         | 0      | 0                                 | 0         | 0      |
|                    | 115. <i>Nygolaimus</i>      | Pr5              | 0.023                          | 0                             | 0         | 1 ± 1  | 0                                 | 0         | 0      |
|                    | 116. <i>Paravulvus</i>      | Pr5              | 0.128                          | 0                             | 0         | 0      | 0                                 | 0         | 1 ± 1  |

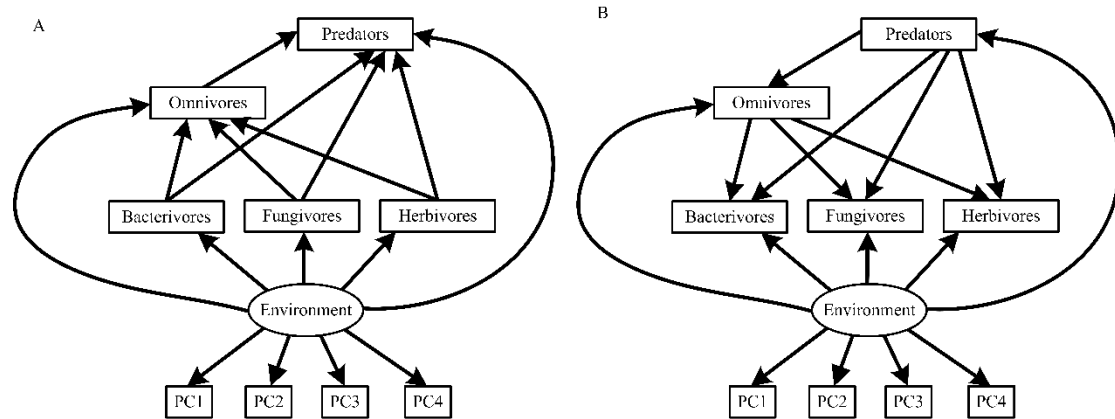

**Figure S1.** An initial model for nematode carbon used in production and budget through food web bottom – up (A) and top – down (B) relationships.

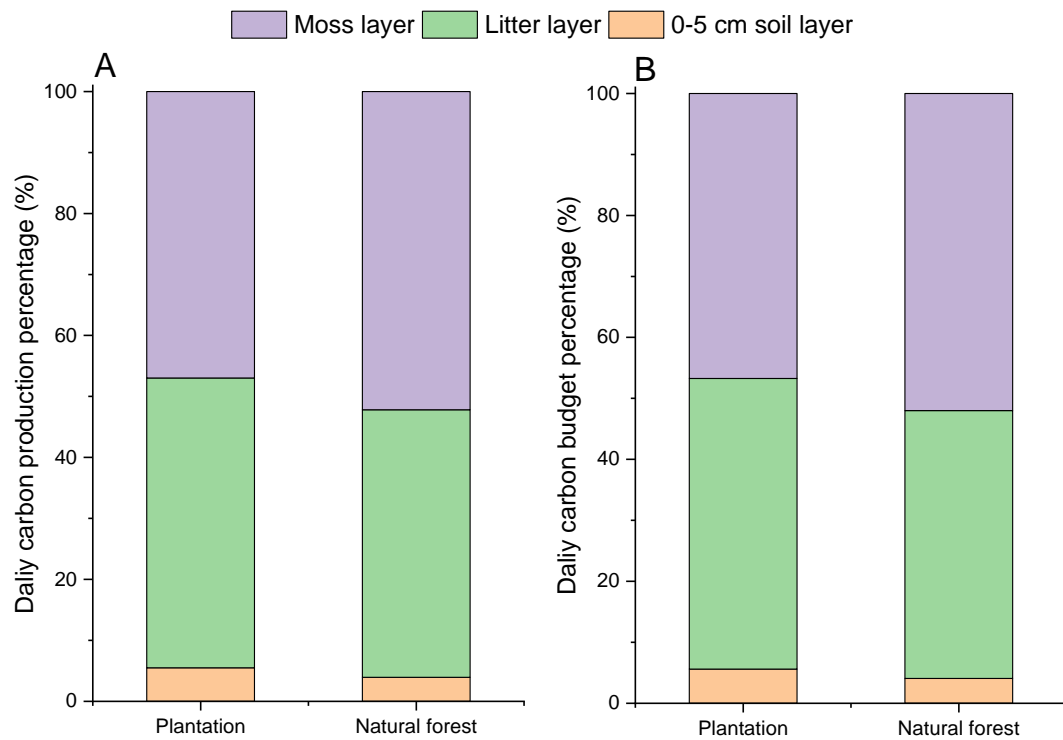

**Figure S2.** Vertical distribution of relative daily carbon used in production (A) and daily carbon budget (B) of nematodes in subalpine plantation and natural forests.



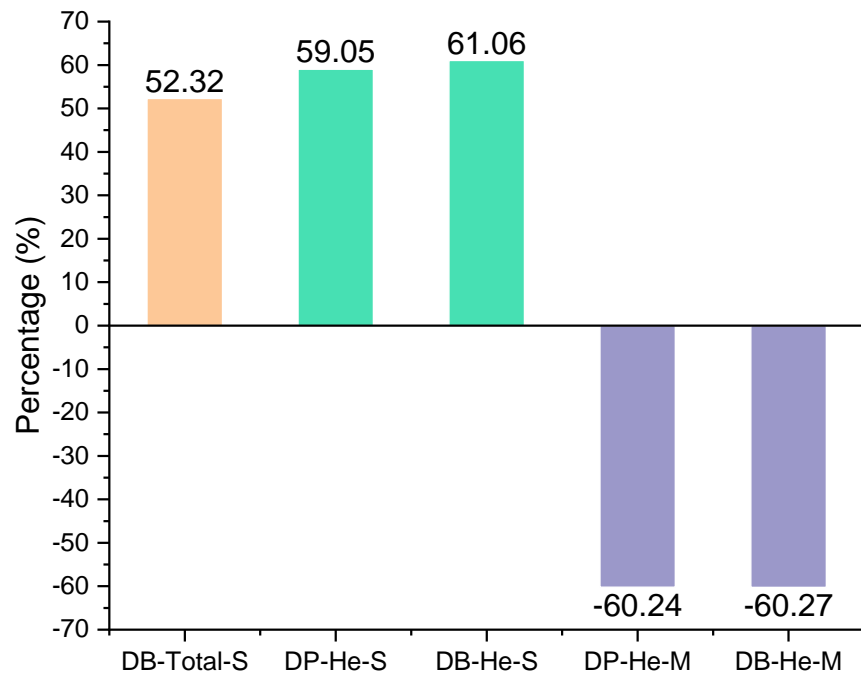

**Figure S3.** Incremental percentage (%) of natural forests converted to plantations. DP: daily carbon used in production; DB: daily carbon budget; Total: total nematodes; He: herbivore nematodes; S: 0–5-cm soil layer; M: moss layer.
